# Supplementary material
Source: publisher figshare collection journal article supplement (https://gsapubs.figshare.com/articles/dataset/_/12947168)
Supplement: Supplementary file 1 [file 1]

Gooley, J.T., Sharman, G.R., and Graham, S.A., 2020, Reconciling along-strike disparity in slip displacement of the San Andreas fault, central California, USA: GSA Bulletin, <https://doi.org/10.1130/B35681.1>.

## Supplemental Material

**Appendix S1.** Sample preparation and analytical methods

**Table S1.** Original sample names

**Table S2.** Explanation of displaced features used in Figures 3 and 14

**Table S3.** Analytical results from University of Arizona LaserChron Center

**Table S4.** Analytical results from University of California, Santa Cruz

**Table S5.** Data sources for modern river and Eocene strata Th/U values in Figure 9.

**Table S6.** Major structures with NW-SE extension or shortening

# Appendix S1: Sample Preparation and Analytical Methods

## Mineral Separation for Detrital Zircon Analysis (Stanford University Earth Materials Lab)

Rock samples were crushed and disaggregated using a Bico-Braun chipmunk jaw crusher and Bico-Braun disk grinder. Disaggregated samples were individually hydrodynamically processed on a Gemini table to concentrate heavy sand fractions. Heavy sand fractions were rinsed in acetone to prevent grains from rusting and then were oven-dried. Less magnetic minerals were concentrated using a sloped Frantz magnetic separator set at a 10° incline and 100 V at 0.4 Å (Å), 0.8 Å, and 1.2 Å. Separates were then run through methylene iodide (MEI) heavy liquid ( $\rho = 3.32 \text{ g/cm}^3$ ) to collect the final nonmagnetic heavy fraction. Sample separates were sent to the University of Arizona LaserChron center to be mounted individually in a 2.54 cm (1 inch) epoxy mount with fragments of primary (FC-Z5, 1099 Ma; Paces and Miller, 1993), Sri Lanka (SL-Mix and SL-F; 563.5 Ma; Gehrels et al., 2008) and secondary (R33, 419 Ma; Black et al., 2004) standard zircons. Mounts were polished to half of mean grain thickness ( $\sim 20 \mu\text{m}$ ) for imaging with a back-scattered electron (BSE) detector, using a Hitachi 3400N scanning electron microscope (SEM). The mounts were then polished to expose the zircon grain cores (1500 grit wet/dry sandpaper, followed by 6  $\mu\text{m}$ , then 1  $\mu\text{m}$  diamond powder slurries) on a Struers LabPol5 rotary polisher, and coated with roughly 10 nm high-purity gold in a Denton sputter coater before analysis.

## U-Pb Geochronology Analysis by LA-ICP-MS (University of Arizona LaserChron Center)

(More information available at [www.laserchron.org](http://www.laserchron.org))

U-Pb geochronology of zircons was conducted by laser ablation multicollector inductively coupled plasma mass spectrometry (LA-MC-ICPMS) at the Arizona LaserChron Center (Gehrels et al., 2006, 2008). The analyses involve ablation of zircon with a Photon Machines Analyte G2 excimer laser using a spot diameter of 30 microns. The ablated material is carried in helium into the plasma source of a Nu HR ICPMS, which is equipped with a flight tube of sufficient width that U, Th, and Pb isotopes are measured simultaneously. All measurements are made in static mode, using Faraday detectors with  $3 \times 10^{11} \text{ ohm}$  resistors for  $^{238}\text{U}$ ,  $^{232}\text{Th}$ ,  $^{208}\text{Pb}$ – $^{206}\text{Pb}$ , and discrete dynode ion counters for  $^{204}\text{Pb}$  and  $^{202}\text{Hg}$ . Ion yields are  $\sim 0.8 \text{ mv}$  per ppm. Each analysis consists of one 15-second integration on peaks with the laser off (for backgrounds), 15 one-second integrations with the laser firing, and a 30 second delay to purge the previous sample and prepare for the next analysis. The ablation pit is  $\sim 15$  microns in depth.

For each analysis, the errors in determining  $^{206}\text{Pb}/^{238}\text{U}$  and  $^{206}\text{Pb}/^{204}\text{Pb}$  result in a measurement error of  $\sim 1\%$ – $2\%$  (at 2-sigma level) in the  $^{206}\text{Pb}/^{238}\text{U}$  age. The errors in measurement of  $^{206}\text{Pb}/^{207}\text{Pb}$  and  $^{206}\text{Pb}/^{204}\text{Pb}$  also result in  $\sim 1\%$ – $2\%$  (at 2-sigma level) uncertainty in age for grains that are  $> 1.0 \text{ Ga}$ , but are substantially larger for younger grains due to low intensity of the  $^{207}\text{Pb}$  signal. For most analyses, the crossover in precision of  $^{206}\text{Pb}/^{238}\text{U}$  and  $^{206}\text{Pb}/^{207}\text{Pb}$  ages occurs at  $\sim 1.0 \text{ Ga}$ . Instrument setup, tuning, run parameters, standard-unknown bracketing, and data reduction followed that of Gehrels and Pecha (2014).

Common Pb correction is accomplished by using the Hg-corrected  $^{204}\text{Pb}$  and assuming an initial Pb composition from Stacey and Kramers (1975). Uncertainties of 1.5 for  $^{206}\text{Pb}/^{204}\text{Pb}$  and 0.3 for  $^{207}\text{Pb}/^{204}\text{Pb}$  are applied to these compositional values based on the variation in Pb

isotopic composition in modern crystal rocks. For each sample, the uncertainty in determining  $^{206}\text{Pb}/^{207}\text{Pb}$  and  $^{206}\text{Pb}/^{238}\text{U}$  ages result in generally 1%–2% (2-sigma) for both. Concentrations of U and Th are calibrated relative to our Sri Lanka zircon, which contains ~518 ppm of U and 68 ppm Th.

### U-Pb Geochronology Data Reduction (University of Arizona LaserChron Center)

U-Pb geochronology analyses by LA-ICP-MS were reduced at the University of Arizona LaserChron Center following standard methods (after Gehrels et al., 2006, 2008; <https://sites.google.com/a/laserchron.org/laserchron/>). Only grains with <20% discordance and <5% reverse discordance are included in interpretations. Final ages are based on  $^{206}\text{Pb}/^{238}\text{U}$  if younger than 900 Ma, and  $^{207}\text{Pb}/^{206}\text{Pb}$  for ages >900 Ma. Data reduction was performed with an in-house Python decoding routine and a Microsoft *Excel* spreadsheet (*NUagecalc*).

### REFERENCES CITED

- Black, L.P., Kamo, S.L., Allen, C.M., Davis, D.W., Aleinikoff, J.N., Valley, J.W., and Foudoulis, C., 2004, Improved  $^{206}\text{Pb}/^{238}\text{U}$  microprobe geochronology by the monitoring of a trace-element related matrix effect; SHRIMP, ID-TIMS, ELA-ICP-MS and oxygen isotope documentation for a series of zircon standards: *Chemical Geology*, v. 205, no. 1, p. 115–140, <https://doi.org/10.1016/j.chemgeo.2004.01.003>.
- Gehrels, G.E., Valencia, V., and Ruiz, J., 2008, Enhanced precision, accuracy, efficiency, and spatial resolution of U-Pb ages by laser ablation–multicollector–inductively coupled plasma–mass spectrometry: *Geochemistry Geophysics Geosystems*, v. 9, Q03017, <https://doi.org/10.1029/2007GC001805>.
- Gehrels, G.E., Valencia, V., and Pullen, A., 2006, Detrital zircon geochronology by Laser-Ablation Multicollector ICPMS at the Arizona LaserChron Center, *in* Loszewski, T., and Huff, W., eds., *Geochronology: Emerging Opportunities*, Paleontology Society Short Course: Paleontology Society Papers, v. 11, 10 p.
- Gehrels, G., and Pecha, M., 2014, Detrital zircon U-Pb geochronology and Hf isotope geochemistry of Paleozoic and Triassic passive margin strata of western North America: *Geosphere*, v. 10, no. 1, p. 49–65, <https://doi.org/10.1130/GES00889.1>.
- Paces, J.B., and Miller, J.D., 1993, Precise U-Pb ages of Duluth Complex and related mafic intrusions, northeastern Minnesota: Geochronological insights to physical, petrogenetic, paleomagnetic, and tectonomagmatic processes associated with the 1.1 Ga Midcontinent Rift system: *Journal of Geophysical Research*, v. 98, B8, p. 13,997–14,013, <https://doi.org/10.1029/93JB01159>.
- Stacey, J.S., and Kramers, J.D., 1975, Approximation of terrestrial lead isotope evolution by a two-stage model: *Earth and Planetary Science Letters*, v. 26, p. 207–221, [https://doi.org/10.1016/0012-821X\(75\)90088-6](https://doi.org/10.1016/0012-821X(75)90088-6).
